# Supplementary material for: Twenty years of measurement of polycyclic aromatic hydrocarbons (PAHs) in UK ambient air by nationwide air quality networks
Source: Royal Society of Chemistry journal article supplement (doi:10.1039/c3em00126a), 2013-01-01
Supplement: c3em00126a.pdf [file c3em00126a.pdf]

## ELECTRONIC SUPPLEMENTARY INFORMATION

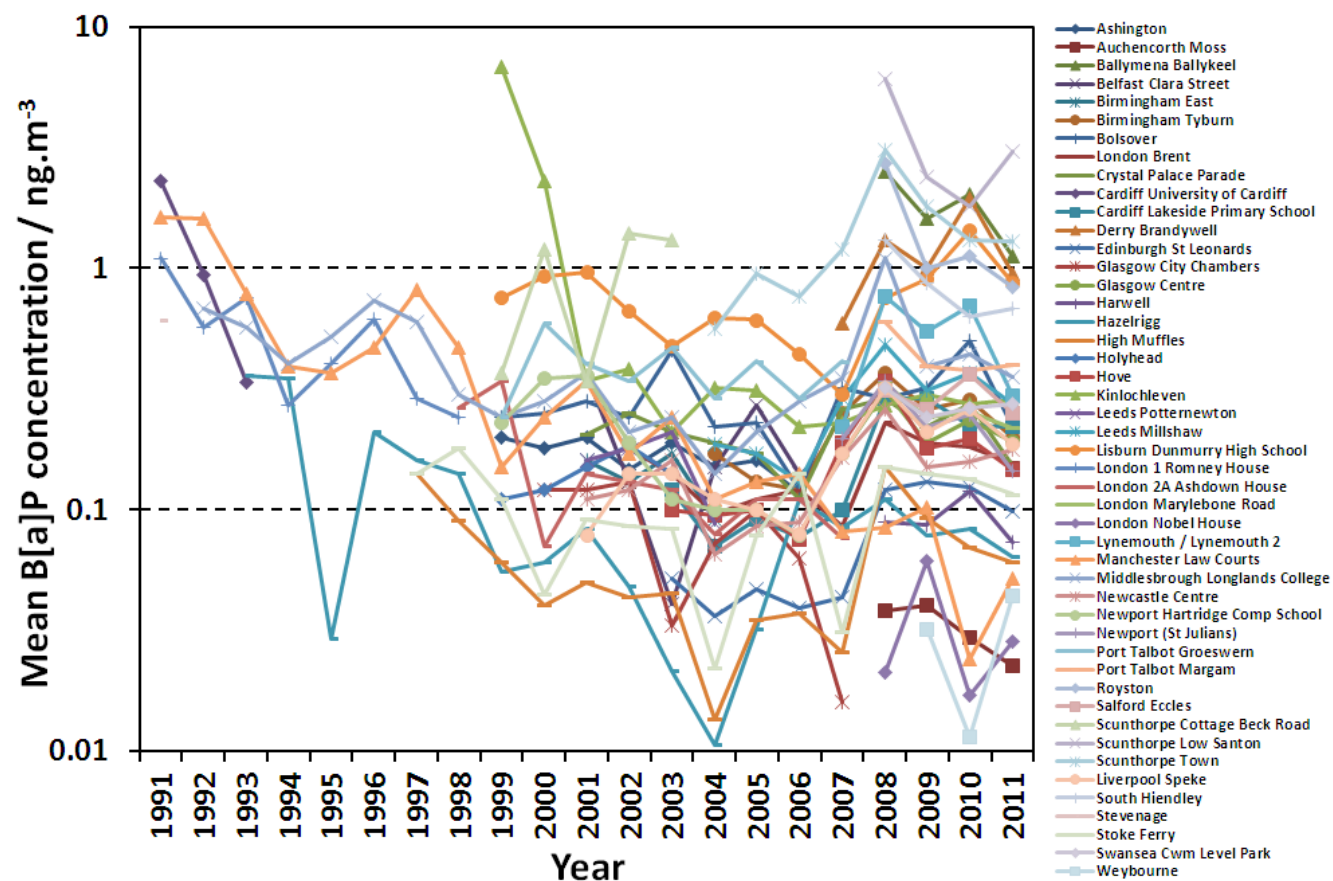

**Figure ESI 1.** Annual mean B[a]P concentration measured at all UK air quality network stations measuring PAHs since 1990. Only stations that have produced at least six individual monthly mean concentrations (or at least two quarterly mean concentrations) during a calendar year are included. The full dataset is available in Table 2.
